# Supplementary material for: Regulation of PD-L1 Expression by YY1 in Cancer: Therapeutic Efficacy of Targeting YY1
Source: MDPI journal article supplement (doi:10.3390/cancers16061237), 2024-03-21
Supplement: s1 [file s1]

**Supplementary Table S1.** Reverse phase protein array data as shown in Figure 8. We investigated variations in the expression of the YY1 and CD274 (PD-L1) genes across pathway activity groups, as defined by their median pathway scores. The bioinformatics analysis spanned 32 diverse cancer types, with a particular focus on the following 10 cancer-related pathways: TSC/mTOR, receptor tyrosine kinase (RTK), RAS/MAPK, PI3K/AKT, Hormone ER, Hormone androgen receptor (AR), EMT, DNA Damage Response, Cell Cycle, and Apoptosis.

| cancertype | symbol | pathway    | fdr         | class      | diff         | entrez |
|------------|--------|------------|-------------|------------|--------------|--------|
| ACC        | CD274  | Apoptosis  | 0.029056501 | Inhibition | -1.364076106 | 29126  |
| ACC        | CD274  | CellCycle  | 0.196818963 | None       | -1.038203629 | 29126  |
| ACC        | CD274  | DNADamage  | 0.463102181 | None       | -0.530278631 | 29126  |
| ACC        | CD274  | EMT        | 0.432251833 | None       | -0.525309434 | 29126  |
| ACC        | CD274  | Hormone AR | 0.396637205 | None       | -0.56081063  | 29126  |
| ACC        | CD274  | Hormone ER | 0.201520642 | None       | 0.488352853  | 29126  |
| ACC        | CD274  | PI3KAKT    | 0.474624621 | None       | -0.611499997 | 29126  |
| ACC        | CD274  | RASMAPK    | 0.197994082 | None       | 0.670859728  | 29126  |
| ACC        | CD274  | RTK        | 0.807214684 | None       | 0.101631198  | 29126  |
| ACC        | CD274  | TSCmTOR    | 0.796399724 | None       | -0.127390385 | 29126  |
| ACC        | YY1    | Apoptosis  | 0.252569435 | None       | 0.924890577  | 7528   |
| ACC        | YY1    | CellCycle  | 0.852335582 | None       | 0.128376333  | 7528   |
| ACC        | YY1    | DNADamage  | 0.51556399  | None       | 0.543415436  | 7528   |
| ACC        | YY1    | EMT        | 0.372072734 | None       | 0.710938668  | 7528   |
| ACC        | YY1    | Hormone AR | 0.62473271  | None       | -0.316619853 | 7528   |
| ACC        | YY1    | Hormone ER | 0.252569435 | None       | -0.553326903 | 7528   |
| ACC        | YY1    | PI3KAKT    | 0.62473271  | None       | 0.46369036   | 7528   |
| ACC        | YY1    | RASMAPK    | 0.348615239 | None       | -0.604628954 | 7528   |
| ACC        | YY1    | RTK        | 0.51556399  | None       | -0.437471723 | 7528   |
| ACC        | YY1    | TSCmTOR    | 0.852335582 | None       | 0.06505651   | 7528   |

|      |       |            |             |            |              |       |
|------|-------|------------|-------------|------------|--------------|-------|
| BLCA | CD274 | Apoptosis  | 3.91E-10    | Activation | 1.0748183    | 29126 |
| BLCA | CD274 | CellCycle  | 0.450161165 | None       | 0.153326754  | 29126 |
| BLCA | CD274 | DNADamage  | 0.00158051  | Inhibition | -0.504028177 | 29126 |
| BLCA | CD274 | EMT        | 2.18E-08    | Activation | 1.90003154   | 29126 |
| BLCA | CD274 | Hormone AR | 1.94E-08    | Inhibition | -1.056321989 | 29126 |
| BLCA | CD274 | Hormone ER | 0.071566249 | None       | 0.141996316  | 29126 |
| BLCA | CD274 | PI3KAKT    | 0.450161165 | None       | -0.238899301 | 29126 |
| BLCA | CD274 | RASMAPK    | 0.76869089  | None       | -0.056477586 | 29126 |
| BLCA | CD274 | RTK        | 0.001300732 | Inhibition | -0.783551594 | 29126 |
| BLCA | CD274 | TSCmTOR    | 0.75437894  | None       | -0.065215337 | 29126 |
| BLCA | YY1   | Apoptosis  | 0.186733956 | None       | 0.267364435  | 7528  |
| BLCA | YY1   | CellCycle  | 0.000712178 | Activation | 0.660546668  | 7528  |
| BLCA | YY1   | DNADamage  | 0.026859908 | Activation | 0.373796819  | 7528  |
| BLCA | YY1   | EMT        | 0.026673242 | Inhibition | -0.85994649  | 7528  |
| BLCA | YY1   | Hormone AR | 0.418883561 | None       | 0.163491369  | 7528  |
| BLCA | YY1   | Hormone ER | 0.026673242 | Inhibition | -0.179724574 | 7528  |
| BLCA | YY1   | PI3KAKT    | 0.304909711 | None       | -0.303896336 | 7528  |
| BLCA | YY1   | RASMAPK    | 0.010121283 | Inhibition | -0.591927489 | 7528  |
| BLCA | YY1   | RTK        | 0.80046643  | None       | -0.057602498 | 7528  |
| BLCA | YY1   | TSCmTOR    | 0.418883561 | None       | -0.1441585   | 7528  |
| BRCA | CD274 | Apoptosis  | 2.29E-11    | Activation | 0.733962059  | 29126 |
| BRCA | CD274 | CellCycle  | 0.19325081  | None       | 0.206067342  | 29126 |
| BRCA | CD274 | DNADamage  | 0.846297002 | None       | -0.025545197 | 29126 |
| BRCA | CD274 | EMT        | 0.039183204 | Activation | 0.455516675  | 29126 |

|      |       |            |             |            |              |       |
|------|-------|------------|-------------|------------|--------------|-------|
| BRCA | CD274 | Hormone AR | 0.000059619 | Inhibition | -0.921209739 | 29126 |
| BRCA | CD274 | Hormone ER | 0.000026136 | Inhibition | -1.278971172 | 29126 |
| BRCA | CD274 | PI3KAKT    | 0.039183204 | Activation | 0.394663828  | 29126 |
| BRCA | CD274 | RASMAPK    | 0.441104986 | None       | 0.118724961  | 29126 |
| BRCA | CD274 | RTK        | 0.336638014 | None       | 0.134571359  | 29126 |
| BRCA | CD274 | TSCmTOR    | 0.325806109 | None       | 0.136040245  | 29126 |
| BRCA | YY1   | Apoptosis  | 8.35E-06    | Activation | 0.505750378  | 7528  |
| BRCA | YY1   | CellCycle  | 1.32E-07    | Activation | 0.739176774  | 7528  |
| BRCA | YY1   | DNADamage  | 0.282944663 | None       | 0.227123437  | 7528  |
| BRCA | YY1   | EMT        | 0.340565381 | None       | -0.248130011 | 7528  |
| BRCA | YY1   | Hormone AR | 0.810138724 | None       | 0.106704056  | 7528  |
| BRCA | YY1   | Hormone ER | 0.298757993 | None       | -0.407185001 | 7528  |
| BRCA | YY1   | PI3KAKT    | 0.810138724 | None       | 0.048650371  | 7528  |
| BRCA | YY1   | RASMAPK    | 0.810138724 | None       | -0.038818641 | 7528  |
| BRCA | YY1   | RTK        | 0.810138724 | None       | -0.029273854 | 7528  |
| BRCA | YY1   | TSCmTOR    | 0.298757993 | None       | -0.164090049 | 7528  |
| CESC | CD274 | Apoptosis  | 0.353222236 | None       | 0.34808516   | 29126 |
| CESC | CD274 | CellCycle  | 0.540729387 | None       | -0.193448655 | 29126 |
| CESC | CD274 | DNADamage  | 0.30901132  | None       | -0.558472562 | 29126 |
| CESC | CD274 | EMT        | 0.540729387 | None       | 0.446571099  | 29126 |
| CESC | CD274 | Hormone AR | 0.353222236 | None       | -0.423341779 | 29126 |
| CESC | CD274 | Hormone ER | 0.565058826 | None       | -0.18503937  | 29126 |
| CESC | CD274 | PI3KAKT    | 0.808486886 | None       | 0.109845664  | 29126 |
| CESC | CD274 | RASMAPK    | 0.615496682 | None       | -0.224402648 | 29126 |

|      |       |            |             |            |              |       |
|------|-------|------------|-------------|------------|--------------|-------|
| CESC | CD274 | RTK        | 0.906678158 | None       | 0.034704581  | 29126 |
| CESC | CD274 | TSCmTOR    | 0.755113284 | None       | -0.106083183 | 29126 |
| CESC | YY1   | Apoptosis  | 0.157642448 | None       | -0.367475399 | 7528  |
| CESC | YY1   | CellCycle  | 0.72570602  | None       | -0.06135411  | 7528  |
| CESC | YY1   | DNADamage  | 0.106168186 | None       | -0.612593878 | 7528  |
| CESC | YY1   | EMT        | 0.72570602  | None       | -0.141552739 | 7528  |
| CESC | YY1   | Hormone AR | 0.026741063 | Inhibition | -0.764327085 | 7528  |
| CESC | YY1   | Hormone ER | 0.157642448 | None       | -0.33304655  | 7528  |
| CESC | YY1   | PI3KAKT    | 0.157642448 | None       | 0.610889666  | 7528  |
| CESC | YY1   | RASMAPK    | 0.42943173  | None       | 0.269511435  | 7528  |
| CESC | YY1   | RTK        | 0.157642448 | None       | 0.484376732  | 7528  |
| CESC | YY1   | TSCmTOR    | 0.20850631  | None       | 0.306873715  | 7528  |
| CHOL | CD274 | Apoptosis  | 0.840751867 | None       | -0.086677098 | 29126 |
| CHOL | CD274 | CellCycle  | 0.599460611 | None       | 0.427709875  | 29126 |
| CHOL | CD274 | DNADamage  | 0.840751867 | None       | 0.13714724   | 29126 |
| CHOL | CD274 | EMT        | 0.840751867 | None       | -0.152470719 | 29126 |
| CHOL | CD274 | Hormone AR | 0.840751867 | None       | 0.129760745  | 29126 |
| CHOL | CD274 | Hormone ER | 0.695686633 | None       | 0.328901894  | 29126 |
| CHOL | CD274 | PI3KAKT    | 0.840751867 | None       | 0.291034641  | 29126 |
| CHOL | CD274 | RASMAPK    | 0.599460611 | None       | 0.698160084  | 29126 |
| CHOL | CD274 | RTK        | 0.599460611 | None       | 0.536489324  | 29126 |
| CHOL | CD274 | TSCmTOR    | 0.840751867 | None       | 0.200210653  | 29126 |
| CHOL | YY1   | Apoptosis  | 0.953409023 | None       | 0.099339831  | 7528  |
| CHOL | YY1   | CellCycle  | 0.953409023 | None       | -0.057778528 | 7528  |

|      |       |            |             |            |              |       |
|------|-------|------------|-------------|------------|--------------|-------|
| CHOL | YY1   | DNADamage  | 0.953409023 | None       | -0.535563869 | 7528  |
| CHOL | YY1   | EMT        | 0.953409023 | None       | -0.592169619 | 7528  |
| CHOL | YY1   | Hormone AR | 0.988209077 | None       | -0.005983232 | 7528  |
| CHOL | YY1   | Hormone ER | 0.953409023 | None       | -0.159119828 | 7528  |
| CHOL | YY1   | PI3KAKT    | 0.953409023 | None       | -0.121247598 | 7528  |
| CHOL | YY1   | RASMAPK    | 0.953409023 | None       | 0.426729765  | 7528  |
| CHOL | YY1   | RTK        | 0.953409023 | None       | 0.31321196   | 7528  |
| CHOL | YY1   | TSCmTOR    | 0.953409023 | None       | -0.261752523 | 7528  |
| COAD | CD274 | Apoptosis  | 0.00326232  | Activation | 0.826552307  | 29126 |
| COAD | CD274 | CellCycle  | 0.291583724 | None       | 0.243701262  | 29126 |
| COAD | CD274 | DNADamage  | 0.001122232 | Inhibition | -0.566233037 | 29126 |
| COAD | CD274 | EMT        | 0.000894906 | Activation | 1.430275703  | 29126 |
| COAD | CD274 | Hormone AR | 0.771108597 | None       | -0.04073036  | 29126 |
| COAD | CD274 | Hormone ER | 0.023448449 | Activation | 0.249260265  | 29126 |
| COAD | CD274 | PI3KAKT    | 0.073787371 | None       | 0.587659183  | 29126 |
| COAD | CD274 | RASMAPK    | 0.023448449 | Activation | 0.791796402  | 29126 |
| COAD | CD274 | RTK        | 0.00074059  | Activation | 0.728155661  | 29126 |
| COAD | CD274 | TSCmTOR    | 0.103839395 | None       | 0.333188586  | 29126 |
| COAD | YY1   | Apoptosis  | 0.603217654 | None       | 0.236914442  | 7528  |
| COAD | YY1   | CellCycle  | 0.512343808 | None       | 0.247987417  | 7528  |
| COAD | YY1   | DNADamage  | 0.723240457 | None       | 0.056598611  | 7528  |
| COAD | YY1   | EMT        | 0.723240457 | None       | -0.171203999 | 7528  |
| COAD | YY1   | Hormone AR | 0.621529316 | None       | 0.108913917  | 7528  |
| COAD | YY1   | Hormone ER | 0.723240457 | None       | -0.038412752 | 7528  |

|      |       |            |             |            |              |       |
|------|-------|------------|-------------|------------|--------------|-------|
| COAD | YY1   | PI3KAKT    | 0.172248464 | None       | -0.58434037  | 7528  |
| COAD | YY1   | RASMAPK    | 0.037843751 | Inhibition | -0.856314416 | 7528  |
| COAD | YY1   | RTK        | 0.022696262 | Inhibition | -0.56430554  | 7528  |
| COAD | YY1   | TSCmTOR    | 0.440211613 | None       | -0.259774589 | 7528  |
| DLBC | CD274 | Apoptosis  | 0.032985601 | Activation | 1.22865819   | 29126 |
| DLBC | CD274 | CellCycle  | 0.194741806 | None       | -0.719759886 | 29126 |
| DLBC | CD274 | DNADamage  | 0.032985601 | Inhibition | -1.516037254 | 29126 |
| DLBC | CD274 | EMT        | 0.93250603  | None       | -0.171200295 | 29126 |
| DLBC | CD274 | Hormone AR | 0.168374349 | None       | -0.804072261 | 29126 |
| DLBC | CD274 | Hormone ER | 0.043314521 | Activation | 0.474245505  | 29126 |
| DLBC | CD274 | PI3KAKT    | 0.93250603  | None       | -0.24722599  | 29126 |
| DLBC | CD274 | RASMAPK    | 0.985961305 | None       | -0.046697134 | 29126 |
| DLBC | CD274 | RTK        | 0.985961305 | None       | 0.009000893  | 29126 |
| DLBC | CD274 | TSCmTOR    | 0.360432095 | None       | 0.502439573  | 29126 |
| DLBC | YY1   | Apoptosis  | 0.77110014  | None       | -0.137081924 | 7528  |
| DLBC | YY1   | CellCycle  | 0.77110014  | None       | 0.408716876  | 7528  |
| DLBC | YY1   | DNADamage  | 0.77110014  | None       | 0.353365823  | 7528  |
| DLBC | YY1   | EMT        | 0.630671038 | None       | -0.561243045 | 7528  |
| DLBC | YY1   | Hormone AR | 0.630671038 | None       | 0.594203882  | 7528  |
| DLBC | YY1   | Hormone ER | 0.630671038 | None       | -0.332164896 | 7528  |
| DLBC | YY1   | PI3KAKT    | 0.77110014  | None       | 0.534401564  | 7528  |
| DLBC | YY1   | RASMAPK    | 0.77110014  | None       | 0.160722184  | 7528  |
| DLBC | YY1   | RTK        | 0.77110014  | None       | 0.414188705  | 7528  |
| DLBC | YY1   | TSCmTOR    | 0.77110014  | None       | 0.142171227  | 7528  |

|      |       |            |             |            |              |       |
|------|-------|------------|-------------|------------|--------------|-------|
| ESCA | CD274 | Apoptosis  | 0.332102536 | None       | 0.293000203  | 29126 |
| ESCA | CD274 | CellCycle  | 0.828926996 | None       | -0.048245264 | 29126 |
| ESCA | CD274 | DNADamage  | 0.093382513 | None       | -0.657375131 | 29126 |
| ESCA | CD274 | EMT        | 0.048008379 | Activation | 1.243498518  | 29126 |
| ESCA | CD274 | Hormone AR | 0.048008379 | Inhibition | -0.700533423 | 29126 |
| ESCA | CD274 | Hormone ER | 0.22109253  | None       | 0.190848077  | 29126 |
| ESCA | CD274 | PI3KAKT    | 0.828926996 | None       | 0.06811258   | 29126 |
| ESCA | CD274 | RASMAPK    | 0.733623304 | None       | -0.163942824 | 29126 |
| ESCA | CD274 | RTK        | 0.086193039 | None       | -0.832049446 | 29126 |
| ESCA | CD274 | TSCmTOR    | 0.758924838 | None       | -0.121155583 | 29126 |
| ESCA | YY1   | Apoptosis  | 0.644208444 | None       | 0.1280769    | 7528  |
| ESCA | YY1   | CellCycle  | 0.388013077 | None       | 0.268460619  | 7528  |
| ESCA | YY1   | DNADamage  | 0.450939426 | None       | 0.319758381  | 7528  |
| ESCA | YY1   | EMT        | 0.450939426 | None       | 0.449643965  | 7528  |
| ESCA | YY1   | Hormone AR | 0.134050052 | None       | -0.517354657 | 7528  |
| ESCA | YY1   | Hormone ER | 0.297431149 | None       | -0.175792964 | 7528  |
| ESCA | YY1   | PI3KAKT    | 0.909804053 | None       | -0.031574326 | 7528  |
| ESCA | YY1   | RASMAPK    | 0.028824908 | Inhibition | -0.649918256 | 7528  |
| ESCA | YY1   | RTK        | 0.028824908 | Inhibition | -1.028883304 | 7528  |
| ESCA | YY1   | TSCmTOR    | 0.028824908 | Inhibition | -0.616844405 | 7528  |
| GBM  | CD274 | Apoptosis  | 0.874488672 | None       | 0.117555055  | 29126 |
| GBM  | CD274 | CellCycle  | 0.874488672 | None       | -0.442440085 | 29126 |
| GBM  | CD274 | DNADamage  | 0.874488672 | None       | -0.363168809 | 29126 |
| GBM  | CD274 | EMT        | 0.874488672 | None       | 0.174423837  | 29126 |

|      |       |            |             |            |              |       |
|------|-------|------------|-------------|------------|--------------|-------|
| GBM  | CD274 | Hormone AR | 0.874488672 | None       | -0.163688423 | 29126 |
| GBM  | CD274 | Hormone ER | 0.874488672 | None       | -0.053737027 | 29126 |
| GBM  | CD274 | PI3KAKT    | 0.874488672 | None       | -0.2924957   | 29126 |
| GBM  | CD274 | RASMAPK    | 0.874488672 | None       | 0.180014613  | 29126 |
| GBM  | CD274 | RTK        | 0.874488672 | None       | 0.240229947  | 29126 |
| GBM  | CD274 | TSCmTOR    | 0.961335356 | None       | 0.022384523  | 29126 |
| GBM  | YY1   | Apoptosis  | 0.496483111 | None       | 0.437929037  | 7528  |
| GBM  | YY1   | CellCycle  | 0.688270976 | None       | 0.199104239  | 7528  |
| GBM  | YY1   | DNADamage  | 0.776858913 | None       | 0.074119415  | 7528  |
| GBM  | YY1   | EMT        | 0.688270976 | None       | 0.143452667  | 7528  |
| GBM  | YY1   | Hormone AR | 0.496483111 | None       | 0.246377535  | 7528  |
| GBM  | YY1   | Hormone ER | 0.632687086 | None       | -0.208419159 | 7528  |
| GBM  | YY1   | PI3KAKT    | 0.600490196 | None       | -0.64300876  | 7528  |
| GBM  | YY1   | RASMAPK    | 0.688270976 | None       | -0.252834027 | 7528  |
| GBM  | YY1   | RTK        | 0.648348083 | None       | 0.398491261  | 7528  |
| GBM  | YY1   | TSCmTOR    | 0.496483111 | None       | -0.742758655 | 7528  |
| HNSC | CD274 | Apoptosis  | 3.45E-07    | Activation | 1.053554     | 29126 |
| HNSC | CD274 | CellCycle  | 0.509333154 | None       | -0.133835792 | 29126 |
| HNSC | CD274 | DNADamage  | 0.026571424 | Inhibition | -0.453819206 | 29126 |
| HNSC | CD274 | EMT        | 0.002649399 | Activation | 1.061031904  | 29126 |
| HNSC | CD274 | Hormone AR | 0.509918218 | None       | -0.115938585 | 29126 |
| HNSC | CD274 | Hormone ER | 0.685055169 | None       | 0.029235609  | 29126 |
| HNSC | CD274 | PI3KAKT    | 0.046324861 | Inhibition | -0.675739919 | 29126 |
| HNSC | CD274 | RASMAPK    | 0.191262384 | None       | -0.275659083 | 29126 |



|      |       |            |             |      |              |       |
|------|-------|------------|-------------|------|--------------|-------|
| HNSC | CD274 | RTK        | 0.175718195 | None | -0.427080087 | 29126 |
| HNSC | CD274 | TSCmTOR    | 0.191504701 | None | -0.283901268 | 29126 |
| HNSC | YY1   | Apoptosis  | 0.993820643 | None | 0.007852291  | 7528  |
| HNSC | YY1   | CellCycle  | 0.449645633 | None | 0.240311957  | 7528  |
| HNSC | YY1   | DNADamage  | 0.829956382 | None | 0.094933611  | 7528  |
| HNSC | YY1   | EMT        | 0.306942676 | None | -0.663258406 | 7528  |
| HNSC | YY1   | Hormone AR | 0.993820643 | None | -0.001219569 | 7528  |
| HNSC | YY1   | Hormone ER | 0.691966537 | None | -0.063537466 | 7528  |
| HNSC | YY1   | PI3KAKT    | 0.676625436 | None | -0.316829098 | 7528  |
| HNSC | YY1   | RASMAPK    | 0.449645633 | None | -0.260653007 | 7528  |
| HNSC | YY1   | RTK        | 0.901442353 | None | 0.089130609  | 7528  |
| HNSC | YY1   | TSCmTOR    | 0.691966537 | None | 0.15493966   | 7528  |
| KICH | CD274 | Apoptosis  | 0.823091752 | None | 0.044116862  | 29126 |
| KICH | CD274 | CellCycle  | 0.612650683 | None | 0.267342027  | 29126 |
| KICH | CD274 | DNADamage  | 0.683374034 | None | 0.296149231  | 29126 |
| KICH | CD274 | EMT        | 0.472193235 | None | 0.767634588  | 29126 |
| KICH | CD274 | Hormone AR | 0.612650683 | None | 0.198704858  | 29126 |
| KICH | CD274 | Hormone ER | 0.612650683 | None | -0.301394671 | 29126 |
| KICH | CD274 | PI3KAKT    | 0.683374034 | None | -0.1683954   | 29126 |
| KICH | CD274 | RASMAPK    | 0.612650683 | None | 0.407871046  | 29126 |
| KICH | CD274 | RTK        | 0.683374034 | None | 0.189961777  | 29126 |
| KICH | CD274 | TSCmTOR    | 0.683374034 | None | 0.142515865  | 29126 |
| KICH | YY1   | Apoptosis  | 0.63340621  | None | -0.251394068 | 7528  |
| KICH | YY1   | CellCycle  | 0.63340621  | None | 0.257405547  | 7528  |

|      |       |            |             |            |              |       |
|------|-------|------------|-------------|------------|--------------|-------|
| KICH | YY1   | DNADamage  | 0.63340621  | None       | 0.448072831  | 7528  |
| KICH | YY1   | EMT        | 0.803415075 | None       | 0.150917251  | 7528  |
| KICH | YY1   | Hormone AR | 0.63340621  | None       | 0.169058771  | 7528  |
| KICH | YY1   | Hormone ER | 0.746226552 | None       | -0.144063985 | 7528  |
| KICH | YY1   | PI3KAKT    | 0.803415075 | None       | 0.098873625  | 7528  |
| KICH | YY1   | RASMAPK    | 0.63340621  | None       | 0.676611628  | 7528  |
| KICH | YY1   | RTK        | 0.746226552 | None       | 0.222937485  | 7528  |
| KICH | YY1   | TSCmTOR    | 0.849986895 | None       | 0.053132683  | 7528  |
| KIRC | CD274 | Apoptosis  | 0.493916883 | None       | 0.087205137  | 29126 |
| KIRC | CD274 | CellCycle  | 0.477809766 | None       | 0.126184937  | 29126 |
| KIRC | CD274 | DNADamage  | 0.38398591  | None       | 0.127287269  | 29126 |
| KIRC | CD274 | EMT        | 0.979091794 | None       | 0.016909381  | 29126 |
| KIRC | CD274 | Hormone AR | 0.27630088  | None       | 0.136040416  | 29126 |
| KIRC | CD274 | Hormone ER | 0.38398591  | None       | 0.148680819  | 29126 |
| KIRC | CD274 | PI3KAKT    | 0.493916883 | None       | 0.153788284  | 29126 |
| KIRC | CD274 | RASMAPK    | 0.979091794 | None       | 0.005155258  | 29126 |
| KIRC | CD274 | RTK        | 0.037074043 | Activation | 0.508057486  | 29126 |
| KIRC | CD274 | TSCmTOR    | 0.046586945 | Inhibition | -0.37626823  | 29126 |
| KIRC | YY1   | Apoptosis  | 0.904717453 | None       | -0.037533697 | 7528  |
| KIRC | YY1   | CellCycle  | 0.853859975 | None       | -0.077689127 | 7528  |
| KIRC | YY1   | DNADamage  | 0.642455152 | None       | -0.115621075 | 7528  |
| KIRC | YY1   | EMT        | 0.642455152 | None       | 0.179968202  | 7528  |
| KIRC | YY1   | Hormone AR | 0.642455152 | None       | 0.089011382  | 7528  |
| KIRC | YY1   | Hormone ER | 0.996199208 | None       | -0.00052041  | 7528  |

|      |       |            |             |            |              |       |
|------|-------|------------|-------------|------------|--------------|-------|
| KIRC | YY1   | PI3KAKT    | 0.904717453 | None       | -0.040287378 | 7528  |
| KIRC | YY1   | RASMAPK    | 0.746775829 | None       | 0.175033262  | 7528  |
| KIRC | YY1   | RTK        | 0.105936419 | None       | 0.44771921   | 7528  |
| KIRC | YY1   | TSCmTOR    | 0.904717453 | None       | 0.051039093  | 7528  |
| KIRP | CD274 | Apoptosis  | 0.990759266 | None       | 0.002153211  | 29126 |
| KIRP | CD274 | CellCycle  | 0.000010871 | Activation | 0.893965915  | 29126 |
| KIRP | CD274 | DNADamage  | 0.1722062   | None       | 0.265578526  | 29126 |
| KIRP | CD274 | EMT        | 0.857609278 | None       | 0.078295848  | 29126 |
| KIRP | CD274 | Hormone AR | 0.130375964 | None       | 0.356025669  | 29126 |
| KIRP | CD274 | Hormone ER | 2.25E-08    | Activation | 0.796935251  | 29126 |
| KIRP | CD274 | PI3KAKT    | 0.043189749 | Inhibition | -0.885033627 | 29126 |
| KIRP | CD274 | RASMAPK    | 0.007323331 | Activation | 0.540415279  | 29126 |
| KIRP | CD274 | RTK        | 0.011531397 | Activation | 0.609768623  | 29126 |
| KIRP | CD274 | TSCmTOR    | 0.418329112 | None       | 0.242843674  | 29126 |
| KIRP | YY1   | Apoptosis  | 0.351892934 | None       | -0.232400455 | 7528  |
| KIRP | YY1   | CellCycle  | 0.02903522  | Activation | 0.535281953  | 7528  |
| KIRP | YY1   | DNADamage  | 0.576808964 | None       | 0.125410221  | 7528  |
| KIRP | YY1   | EMT        | 0.107396529 | None       | -0.546072115 | 7528  |
| KIRP | YY1   | Hormone AR | 0.003509063 | Activation | 0.715475648  | 7528  |
| KIRP | YY1   | Hormone ER | 0.576808964 | None       | -0.103552006 | 7528  |
| KIRP | YY1   | PI3KAKT    | 0.946661107 | None       | -0.026118582 | 7528  |
| KIRP | YY1   | RASMAPK    | 0.815289708 | None       | -0.061434933 | 7528  |
| KIRP | YY1   | RTK        | 0.030456447 | Activation | 0.566952992  | 7528  |
| KIRP | YY1   | TSCmTOR    | 0.351098404 | None       | -0.338062169 | 7528  |

|      |       |            |             |            |              |       |
|------|-------|------------|-------------|------------|--------------|-------|
| LGG  | CD274 | Apoptosis  | 0.590294969 | None       | 0.05934921   | 29126 |
| LGG  | CD274 | CellCycle  | 0.590294969 | None       | 0.089087173  | 29126 |
| LGG  | CD274 | DNADamage  | 0.000020244 | Inhibition | -0.643786857 | 29126 |
| LGG  | CD274 | EMT        | 0.246729341 | None       | 0.168307279  | 29126 |
| LGG  | CD274 | Hormone AR | 0.540044239 | None       | -0.083038963 | 29126 |
| LGG  | CD274 | Hormone ER | 0.246738973 | None       | 0.119426242  | 29126 |
| LGG  | CD274 | PI3KAKT    | 0.6505135   | None       | -0.090204107 | 29126 |
| LGG  | CD274 | RASMAPK    | 0.6505135   | None       | 0.069856322  | 29126 |
| LGG  | CD274 | RTK        | 0.149831634 | None       | 0.390306348  | 29126 |
| LGG  | CD274 | TSCmTOR    | 0.591652555 | None       | -0.10138575  | 29126 |
| LGG  | YY1   | Apoptosis  | 0.135197868 | None       | 0.1430914    | 7528  |
| LGG  | YY1   | CellCycle  | 0.7003558   | None       | 0.052347316  | 7528  |
| LGG  | YY1   | DNADamage  | 0.000011504 | Activation | 0.656021371  | 7528  |
| LGG  | YY1   | EMT        | 0.206996751 | None       | 0.145836392  | 7528  |
| LGG  | YY1   | Hormone AR | 0.135197868 | None       | 0.145536906  | 7528  |
| LGG  | YY1   | Hormone ER | 0.897229094 | None       | -0.009378538 | 7528  |
| LGG  | YY1   | PI3KAKT    | 0.228337398 | None       | 0.270279352  | 7528  |
| LGG  | YY1   | RASMAPK    | 0.135197868 | None       | 0.332104611  | 7528  |
| LGG  | YY1   | RTK        | 0.633540073 | None       | 0.121190673  | 7528  |
| LGG  | YY1   | TSCmTOR    | 0.176239535 | None       | -0.240738748 | 7528  |
| LIHC | CD274 | Apoptosis  | 0.652348303 | None       | 0.089519902  | 29126 |
| LIHC | CD274 | CellCycle  | 0.929464272 | None       | 0.015275171  | 29126 |
| LIHC | CD274 | DNADamage  | 0.652348303 | None       | 0.104350968  | 29126 |
| LIHC | CD274 | EMT        | 0.281788659 | None       | 0.3173931    | 29126 |

|      |       |            |             |            |              |       |
|------|-------|------------|-------------|------------|--------------|-------|
| LIHC | CD274 | Hormone AR | 0.581056063 | None       | 0.144838274  | 29126 |
| LIHC | CD274 | Hormone ER | 0.281788659 | None       | 0.259988003  | 29126 |
| LIHC | CD274 | PI3KAKT    | 0.652348303 | None       | 0.127328578  | 29126 |
| LIHC | CD274 | RASMAPK    | 0.652348303 | None       | 0.155569639  | 29126 |
| LIHC | CD274 | RTK        | 0.929464272 | None       | -0.047730253 | 29126 |
| LIHC | CD274 | TSCmTOR    | 0.929464272 | None       | 0.01478122   | 29126 |
| LIHC | YY1   | Apoptosis  | 0.897184737 | None       | -0.032602318 | 7528  |
| LIHC | YY1   | CellCycle  | 0.865737936 | None       | 0.052306276  | 7528  |
| LIHC | YY1   | DNADamage  | 0.865737936 | None       | -0.084229134 | 7528  |
| LIHC | YY1   | EMT        | 0.897184737 | None       | -0.021626645 | 7528  |
| LIHC | YY1   | Hormone AR | 0.865737936 | None       | -0.080690897 | 7528  |
| LIHC | YY1   | Hormone ER | 0.865737936 | None       | 0.078291109  | 7528  |
| LIHC | YY1   | PI3KAKT    | 0.302223311 | None       | 0.367494725  | 7528  |
| LIHC | YY1   | RASMAPK    | 0.897184737 | None       | -0.033584102 | 7528  |
| LIHC | YY1   | RTK        | 0.865737936 | None       | 0.118967374  | 7528  |
| LIHC | YY1   | TSCmTOR    | 0.865737936 | None       | 0.09031499   | 7528  |
| LUAD | CD274 | Apoptosis  | 0.122811959 | None       | 0.348828814  | 29126 |
| LUAD | CD274 | CellCycle  | 0.721568319 | None       | -0.110308683 | 29126 |
| LUAD | CD274 | DNADamage  | 0.318306825 | None       | -0.205319733 | 29126 |
| LUAD | CD274 | EMT        | 2.29E-06    | Activation | 1.123435793  | 29126 |
| LUAD | CD274 | Hormone AR | 0.984874626 | None       | 0.003008624  | 29126 |
| LUAD | CD274 | Hormone ER | 0.318306825 | None       | 0.110422869  | 29126 |
| LUAD | CD274 | PI3KAKT    | 0.750674363 | None       | -0.096290501 | 29126 |
| LUAD | CD274 | RASMAPK    | 0.266299253 | None       | 0.345178901  | 29126 |

|      |       |            |             |            |              |       |
|------|-------|------------|-------------|------------|--------------|-------|
| LUAD | CD274 | RTK        | 0.39660684  | None       | 0.254689032  | 29126 |
| LUAD | CD274 | TSCmTOR    | 0.750674363 | None       | 0.085429216  | 29126 |
| LUAD | YY1   | Apoptosis  | 0.003552665 | Activation | 0.521948424  | 7528  |
| LUAD | YY1   | CellCycle  | 0.000118241 | Activation | 0.711306148  | 7528  |
| LUAD | YY1   | DNADamage  | 0.339079828 | None       | 0.169586679  | 7528  |
| LUAD | YY1   | EMT        | 0.143553645 | None       | 0.416670983  | 7528  |
| LUAD | YY1   | Hormone AR | 0.981485943 | None       | -0.003694469 | 7528  |
| LUAD | YY1   | Hormone ER | 0.228736842 | None       | -0.123870612 | 7528  |
| LUAD | YY1   | PI3KAKT    | 0.539301236 | None       | -0.15947603  | 7528  |
| LUAD | YY1   | RASMAPK    | 0.02465619  | Inhibition | -0.524754174 | 7528  |
| LUAD | YY1   | RTK        | 0.539301236 | None       | -0.162885141 | 7528  |
| LUAD | YY1   | TSCmTOR    | 0.339079828 | None       | -0.209642962 | 7528  |
| LUSC | CD274 | Apoptosis  | 0.625349939 | None       | -0.154128799 | 29126 |
| LUSC | CD274 | CellCycle  | 0.85130031  | None       | 0.028537946  | 29126 |
| LUSC | CD274 | DNADamage  | 0.85130031  | None       | -0.028006475 | 29126 |
| LUSC | CD274 | EMT        | 0.625349939 | None       | 0.199690401  | 29126 |
| LUSC | CD274 | Hormone AR | 0.625349939 | None       | 0.122737595  | 29126 |
| LUSC | CD274 | Hormone ER | 0.365641576 | None       | 0.104397633  | 29126 |
| LUSC | CD274 | PI3KAKT    | 0.85130031  | None       | 0.107948751  | 29126 |
| LUSC | CD274 | RASMAPK    | 0.365641576 | None       | -0.301004425 | 29126 |
| LUSC | CD274 | RTK        | 0.85130031  | None       | -0.048487999 | 29126 |
| LUSC | CD274 | TSCmTOR    | 0.091358745 | None       | -0.513621577 | 29126 |
| LUSC | YY1   | Apoptosis  | 0.048837992 | Activation | 0.374239029  | 7528  |
| LUSC | YY1   | CellCycle  | 0.142002565 | None       | 0.288165161  | 7528  |

|      |       |            |             |            |              |       |
|------|-------|------------|-------------|------------|--------------|-------|
| LUSC | YY1   | DNADamage  | 0.309799104 | None       | -0.191259369 | 7528  |
| LUSC | YY1   | EMT        | 0.192101892 | None       | -0.357983742 | 7528  |
| LUSC | YY1   | Hormone AR | 0.040182477 | Inhibition | -0.36402991  | 7528  |
| LUSC | YY1   | Hormone ER | 0.010757901 | Inhibition | -0.212757783 | 7528  |
| LUSC | YY1   | PI3KAKT    | 0.995022983 | None       | 0.0021782    | 7528  |
| LUSC | YY1   | RASMAPK    | 0.736676175 | None       | -0.077767567 | 7528  |
| LUSC | YY1   | RTK        | 0.736676175 | None       | -0.088107717 | 7528  |
| LUSC | YY1   | TSCmTOR    | 0.472060533 | None       | 0.191252657  | 7528  |
| MESO | CD274 | Apoptosis  | 0.823234175 | None       | 0.086430339  | 29126 |
| MESO | CD274 | CellCycle  | 0.517061857 | None       | -0.348179284 | 29126 |
| MESO | CD274 | DNADamage  | 0.336828103 | None       | -0.620257016 | 29126 |
| MESO | CD274 | EMT        | 0.356884446 | None       | -0.560656026 | 29126 |
| MESO | CD274 | Hormone AR | 0.580712026 | None       | -0.214190673 | 29126 |
| MESO | CD274 | Hormone ER | 0.823234175 | None       | -0.069704835 | 29126 |
| MESO | CD274 | PI3KAKT    | 0.873495255 | None       | -0.072003295 | 29126 |
| MESO | CD274 | RASMAPK    | 0.336828103 | None       | -0.913536418 | 29126 |
| MESO | CD274 | RTK        | 0.336828103 | None       | -0.682045204 | 29126 |
| MESO | CD274 | TSCmTOR    | 0.336828103 | None       | -0.794934024 | 29126 |
| MESO | YY1   | Apoptosis  | 0.557198979 | None       | 0.293966184  | 7528  |
| MESO | YY1   | CellCycle  | 0.972681448 | None       | 0.011940572  | 7528  |
| MESO | YY1   | DNADamage  | 0.769492355 | None       | 0.238661762  | 7528  |
| MESO | YY1   | EMT        | 0.064415882 | None       | -1.098757761 | 7528  |
| MESO | YY1   | Hormone AR | 0.769492355 | None       | -0.101938296 | 7528  |
| MESO | YY1   | Hormone ER | 0.434723934 | None       | -0.349631597 | 7528  |

|      |       |            |             |            |              |       |
|------|-------|------------|-------------|------------|--------------|-------|
| MESO | YY1   | PI3KAKT    | 0.636402462 | None       | 0.450781082  | 7528  |
| MESO | YY1   | RASMAPK    | 0.557198979 | None       | -0.56272589  | 7528  |
| MESO | YY1   | RTK        | 0.769492355 | None       | 0.243543468  | 7528  |
| MESO | YY1   | TSCmTOR    | 0.769492355 | None       | -0.206576034 | 7528  |
| OV   | CD274 | Apoptosis  | 0.004195136 | Activation | 0.611936752  | 29126 |
| OV   | CD274 | CellCycle  | 0.881088593 | None       | -0.043623314 | 29126 |
| OV   | CD274 | DNADamage  | 0.000315751 | Inhibition | -1.023841665 | 29126 |
| OV   | CD274 | EMT        | 0.38961628  | None       | 0.334651894  | 29126 |
| OV   | CD274 | Hormone AR | 0.38961628  | None       | -0.228438532 | 29126 |
| OV   | CD274 | Hormone ER | 0.38961628  | None       | -0.303950921 | 29126 |
| OV   | CD274 | PI3KAKT    | 0.24124132  | None       | -0.62872723  | 29126 |
| OV   | CD274 | RASMAPK    | 0.235316329 | None       | 0.663359212  | 29126 |
| OV   | CD274 | RTK        | 0.719467628 | None       | -0.087333706 | 29126 |
| OV   | CD274 | TSCmTOR    | 0.881088593 | None       | -0.03237971  | 29126 |
| OV   | YY1   | Apoptosis  | 0.974430777 | None       | 0.29665989   | 7528  |
| OV   | YY1   | CellCycle  | 0.974430777 | None       | 0.101396048  | 7528  |
| OV   | YY1   | DNADamage  | 0.974430777 | None       | 0.110220124  | 7528  |
| OV   | YY1   | EMT        | 0.974430777 | None       | -0.077654348 | 7528  |
| OV   | YY1   | Hormone AR | 0.974430777 | None       | 0.077776243  | 7528  |
| OV   | YY1   | Hormone ER | 0.974430777 | None       | 0.010537123  | 7528  |
| OV   | YY1   | PI3KAKT    | 0.974430777 | None       | 0.052936156  | 7528  |
| OV   | YY1   | RASMAPK    | 0.974430777 | None       | -0.011458044 | 7528  |
| OV   | YY1   | RTK        | 0.974430777 | None       | -0.083449676 | 7528  |
| OV   | YY1   | TSCmTOR    | 0.974430777 | None       | -0.109099867 | 7528  |



|      |       |            |             |            |              |       |
|------|-------|------------|-------------|------------|--------------|-------|
| PAAD | CD274 | Apoptosis  | 0.881638398 | None       | 0.085587719  | 29126 |
| PAAD | CD274 | CellCycle  | 0.819574068 | None       | 0.242847238  | 29126 |
| PAAD | CD274 | DNADamage  | 0.881638398 | None       | 0.056560908  | 29126 |
| PAAD | CD274 | EMT        | 0.819574068 | None       | 0.527774177  | 29126 |
| PAAD | CD274 | Hormone AR | 0.819574068 | None       | 0.373745027  | 29126 |
| PAAD | CD274 | Hormone ER | 0.881638398 | None       | 0.058013862  | 29126 |
| PAAD | CD274 | PI3KAKT    | 0.881638398 | None       | -0.072981172 | 29126 |
| PAAD | CD274 | RASMAPK    | 0.881638398 | None       | 0.154140543  | 29126 |
| PAAD | CD274 | RTK        | 0.669243256 | None       | 0.477836687  | 29126 |
| PAAD | CD274 | TSCmTOR    | 0.881638398 | None       | 0.082226868  | 29126 |
| PAAD | YY1   | Apoptosis  | 0.10443571  | None       | 0.700427831  | 7528  |
| PAAD | YY1   | CellCycle  | 0.023560321 | Activation | 0.633446784  | 7528  |
| PAAD | YY1   | DNADamage  | 0.814105049 | None       | 0.088260386  | 7528  |
| PAAD | YY1   | EMT        | 0.727436737 | None       | 0.227258328  | 7528  |
| PAAD | YY1   | Hormone AR | 0.727436737 | None       | 0.185273053  | 7528  |
| PAAD | YY1   | Hormone ER | 0.727436737 | None       | 0.092167387  | 7528  |
| PAAD | YY1   | PI3KAKT    | 0.22914465  | None       | -0.653120916 | 7528  |
| PAAD | YY1   | RASMAPK    | 0.727436737 | None       | 0.150239555  | 7528  |
| PAAD | YY1   | RTK        | 0.22914465  | None       | 0.441638649  | 7528  |
| PAAD | YY1   | TSCmTOR    | 0.614341193 | None       | -0.293402367 | 7528  |
| PCPG | CD274 | Apoptosis  | 0.516434605 | None       | 0.382192887  | 29126 |
| PCPG | CD274 | CellCycle  | 0.898997747 | None       | -0.069892942 | 29126 |
| PCPG | CD274 | DNADamage  | 0.086152231 | None       | -0.726087763 | 29126 |
| PCPG | CD274 | EMT        | 0.905150798 | None       | 0.023116282  | 29126 |

|      |       |            |             |            |              |       |
|------|-------|------------|-------------|------------|--------------|-------|
| PCPG | CD274 | Hormone AR | 0.475572122 | None       | -0.393394225 | 29126 |
| PCPG | CD274 | Hormone ER | 0.551969287 | None       | -0.13873325  | 29126 |
| PCPG | CD274 | PI3KAKT    | 0.898997747 | None       | -0.098043812 | 29126 |
| PCPG | CD274 | RASMAPK    | 0.086152231 | None       | 0.836585965  | 29126 |
| PCPG | CD274 | RTK        | 0.475572122 | None       | 0.294440726  | 29126 |
| PCPG | CD274 | TSCmTOR    | 0.234019761 | None       | 0.825815975  | 29126 |
| PCPG | YY1   | Apoptosis  | 0.870454964 | None       | -0.057779266 | 7528  |
| PCPG | YY1   | CellCycle  | 0.2760708   | None       | 0.455084256  | 7528  |
| PCPG | YY1   | DNADamage  | 0.43953937  | None       | 0.340369436  | 7528  |
| PCPG | YY1   | EMT        | 0.2760708   | None       | -0.36532698  | 7528  |
| PCPG | YY1   | Hormone AR | 0.43953937  | None       | 0.352599904  | 7528  |
| PCPG | YY1   | Hormone ER | 0.783295315 | None       | 0.096939952  | 7528  |
| PCPG | YY1   | PI3KAKT    | 0.783295315 | None       | 0.216991097  | 7528  |
| PCPG | YY1   | RASMAPK    | 0.43953937  | None       | 0.416785868  | 7528  |
| PCPG | YY1   | RTK        | 0.391321162 | None       | 0.388820595  | 7528  |
| PCPG | YY1   | TSCmTOR    | 0.870454964 | None       | 0.124558405  | 7528  |
| PRAD | CD274 | Apoptosis  | 0.515527655 | None       | -0.055279246 | 29126 |
| PRAD | CD274 | CellCycle  | 0.219637717 | None       | -0.115193583 | 29126 |
| PRAD | CD274 | DNADamage  | 0.00151701  | Inhibition | -0.429102414 | 29126 |
| PRAD | CD274 | EMT        | 0.05836006  | None       | 0.424575362  | 29126 |
| PRAD | CD274 | Hormone AR | 0.007641323 | Inhibition | -0.384091758 | 29126 |
| PRAD | CD274 | Hormone ER | 0.338849127 | None       | 0.063886996  | 29126 |
| PRAD | CD274 | PI3KAKT    | 0.041241521 | Activation | 0.534344604  | 29126 |
| PRAD | CD274 | RASMAPK    | 0.007641323 | Activation | 0.601817823  | 29126 |

|      |       |            |             |            |              |       |
|------|-------|------------|-------------|------------|--------------|-------|
| PRAD | CD274 | RTK        | 0.007641323 | Activation | 0.420161555  | 29126 |
| PRAD | CD274 | TSCmTOR    | 0.007641323 | Activation | 0.542483317  | 29126 |
| PRAD | YY1   | Apoptosis  | 0.000046959 | Activation | 0.374064275  | 7528  |
| PRAD | YY1   | CellCycle  | 0.042710354 | Activation | 0.175060079  | 7528  |
| PRAD | YY1   | DNADamage  | 0.000276226 | Activation | 0.44456719   | 7528  |
| PRAD | YY1   | EMT        | 0.007817218 | Inhibition | -0.586253445 | 7528  |
| PRAD | YY1   | Hormone AR | 0.000046959 | Activation | 0.559550834  | 7528  |
| PRAD | YY1   | Hormone ER | 0.612425471 | None       | -0.03181523  | 7528  |
| PRAD | YY1   | PI3KAKT    | 0.004445962 | Inhibition | -0.723730691 | 7528  |
| PRAD | YY1   | RASMAPK    | 0.000276226 | Inhibition | -0.799040758 | 7528  |
| PRAD | YY1   | RTK        | 0.009441939 | Inhibition | -0.383969516 | 7528  |
| PRAD | YY1   | TSCmTOR    | 0.030133164 | Inhibition | -0.421601499 | 7528  |
| READ | CD274 | Apoptosis  | 0.907752254 | None       | -0.050830322 | 29126 |
| READ | CD274 | CellCycle  | 0.298967208 | None       | 0.485974652  | 29126 |
| READ | CD274 | DNADamage  | 0.067419837 | None       | -0.982397533 | 29126 |
| READ | CD274 | EMT        | 0.247004123 | None       | 1.021648989  | 29126 |
| READ | CD274 | Hormone AR | 0.226096886 | None       | -0.635250107 | 29126 |
| READ | CD274 | Hormone ER | 0.247004123 | None       | 0.248821936  | 29126 |
| READ | CD274 | PI3KAKT    | 0.068563974 | None       | 1.390924084  | 29126 |
| READ | CD274 | RASMAPK    | 0.214621829 | None       | 1.030336794  | 29126 |
| READ | CD274 | RTK        | 0.421254004 | None       | 0.290505793  | 29126 |
| READ | CD274 | TSCmTOR    | 0.247004123 | None       | 0.435821212  | 29126 |
| READ | YY1   | Apoptosis  | 0.951510804 | None       | 0.724565306  | 7528  |
| READ | YY1   | CellCycle  | 0.993534132 | None       | 0.04255604   | 7528  |

|      |       |            |             |            |              |       |
|------|-------|------------|-------------|------------|--------------|-------|
| READ | YY1   | DNADamage  | 0.993534132 | None       | 0.109331593  | 7528  |
| READ | YY1   | EMT        | 0.993534132 | None       | -0.321062857 | 7528  |
| READ | YY1   | Hormone AR | 0.993534132 | None       | 0.119559366  | 7528  |
| READ | YY1   | Hormone ER | 0.993534132 | None       | -0.050205104 | 7528  |
| READ | YY1   | PI3KAKT    | 0.993534132 | None       | 0.047287453  | 7528  |
| READ | YY1   | RASMAPK    | 0.993534132 | None       | -0.20507733  | 7528  |
| READ | YY1   | RTK        | 0.993534132 | None       | -0.063281173 | 7528  |
| READ | YY1   | TSCmTOR    | 0.993534132 | None       | 0.002607055  | 7528  |
| SARC | CD274 | Apoptosis  | 0.93313871  | None       | -0.027492193 | 29126 |
| SARC | CD274 | CellCycle  | 0.148949995 | None       | 0.46977906   | 29126 |
| SARC | CD274 | DNADamage  | 0.000255203 | Inhibition | -1.028888996 | 29126 |
| SARC | CD274 | EMT        | 0.148949995 | None       | -0.385045074 | 29126 |
| SARC | CD274 | Hormone AR | 0.436833586 | None       | -0.248134308 | 29126 |
| SARC | CD274 | Hormone ER | 0.93313871  | None       | 0.023223765  | 29126 |
| SARC | CD274 | PI3KAKT    | 0.148949995 | None       | 0.71992665   | 29126 |
| SARC | CD274 | RASMAPK    | 0.249795467 | None       | 0.369051245  | 29126 |
| SARC | CD274 | RTK        | 0.877129482 | None       | 0.111476992  | 29126 |
| SARC | CD274 | TSCmTOR    | 0.93313871  | None       | -0.018694037 | 29126 |
| SARC | YY1   | Apoptosis  | 0.71846428  | None       | 0.076660834  | 7528  |
| SARC | YY1   | CellCycle  | 0.000582709 | Activation | 0.925763962  | 7528  |
| SARC | YY1   | DNADamage  | 0.38423092  | None       | -0.356404142 | 7528  |
| SARC | YY1   | EMT        | 0.493824684 | None       | -0.235493543 | 7528  |
| SARC | YY1   | Hormone AR | 0.752530289 | None       | -0.069892968 | 7528  |
| SARC | YY1   | Hormone ER | 0.026445907 | Inhibition | -0.422038216 | 7528  |

|      |       |            |             |      |              |       |
|------|-------|------------|-------------|------|--------------|-------|
| SARC | YY1   | PI3KAKT    | 0.077927281 | None | 0.87064359   | 7528  |
| SARC | YY1   | RASMAPK    | 0.71846428  | None | -0.156337428 | 7528  |
| SARC | YY1   | RTK        | 0.71846428  | None | -0.122147803 | 7528  |
| SARC | YY1   | TSCmTOR    | 0.71846428  | None | 0.139626652  | 7528  |
| SKCM | CD274 | Apoptosis  | 0.933964802 | None | 0.463314959  | 29126 |
| SKCM | CD274 | CellCycle  | 0.933964802 | None | 0.118430424  | 29126 |
| SKCM | CD274 | DNADamage  | 0.933964802 | None | 0.249102833  | 29126 |
| SKCM | CD274 | EMT        | 0.933964802 | None | -0.302931928 | 29126 |
| SKCM | CD274 | Hormone AR | 0.933964802 | None | 0.053855554  | 29126 |
| SKCM | CD274 | Hormone ER | 0.933964802 | None | 0.057153748  | 29126 |
| SKCM | CD274 | PI3KAKT    | 0.933964802 | None | 0.317085294  | 29126 |
| SKCM | CD274 | RASMAPK    | 0.933964802 | None | 0.027320337  | 29126 |
| SKCM | CD274 | RTK        | 0.933964802 | None | -0.020202124 | 29126 |
| SKCM | CD274 | TSCmTOR    | 0.933964802 | None | 0.219525907  | 29126 |
| SKCM | YY1   | Apoptosis  | 0.863125225 | None | -0.094865998 | 7528  |
| SKCM | YY1   | CellCycle  | 0.960528657 | None | 0.014147123  | 7528  |
| SKCM | YY1   | DNADamage  | 0.482409068 | None | 0.340759819  | 7528  |
| SKCM | YY1   | EMT        | 0.557097149 | None | -0.374789329 | 7528  |
| SKCM | YY1   | Hormone AR | 0.241969675 | None | 0.497575921  | 7528  |
| SKCM | YY1   | Hormone ER | 0.863125225 | None | 0.045976968  | 7528  |
| SKCM | YY1   | PI3KAKT    | 0.863125225 | None | 0.172576857  | 7528  |
| SKCM | YY1   | RASMAPK    | 0.241969675 | None | -0.670339841 | 7528  |
| SKCM | YY1   | RTK        | 0.241969675 | None | -0.416658613 | 7528  |
| SKCM | YY1   | TSCmTOR    | 0.685327431 | None | -0.277582087 | 7528  |

|      |       |            |             |            |              |       |
|------|-------|------------|-------------|------------|--------------|-------|
| STAD | CD274 | Apoptosis  | 0.000041802 | Activation | 0.988794566  | 29126 |
| STAD | CD274 | CellCycle  | 0.23454213  | None       | 0.293436313  | 29126 |
| STAD | CD274 | DNADamage  | 0.160331743 | None       | -0.325974856 | 29126 |
| STAD | CD274 | EMT        | 0.822900041 | None       | 0.061193963  | 29126 |
| STAD | CD274 | Hormone AR | 0.068594606 | None       | -0.473022667 | 29126 |
| STAD | CD274 | Hormone ER | 0.160331743 | None       | 0.107515932  | 29126 |
| STAD | CD274 | PI3KAKT    | 0.759464558 | None       | -0.094014873 | 29126 |
| STAD | CD274 | RASMAPK    | 0.759464558 | None       | -0.09072165  | 29126 |
| STAD | CD274 | RTK        | 0.156712934 | None       | -0.423014771 | 29126 |
| STAD | CD274 | TSCmTOR    | 0.068594606 | None       | -0.448353446 | 29126 |
| STAD | YY1   | Apoptosis  | 0.120074384 | None       | 0.410353859  | 7528  |
| STAD | YY1   | CellCycle  | 0.009156023 | Activation | 0.65146774   | 7528  |
| STAD | YY1   | DNADamage  | 0.05452706  | None       | 0.439411907  | 7528  |
| STAD | YY1   | EMT        | 0.00101054  | Inhibition | -1.048710588 | 7528  |
| STAD | YY1   | Hormone AR | 0.365786538 | None       | 0.246084147  | 7528  |
| STAD | YY1   | Hormone ER | 0.053433073 | None       | -0.15514613  | 7528  |
| STAD | YY1   | PI3KAKT    | 0.680347035 | None       | 0.117824049  | 7528  |
| STAD | YY1   | RASMAPK    | 0.680347035 | None       | -0.100252258 | 7528  |
| STAD | YY1   | RTK        | 0.981431083 | None       | 0.005259115  | 7528  |
| STAD | YY1   | TSCmTOR    | 0.37539521  | None       | 0.216896675  | 7528  |
| TGCT | CD274 | Apoptosis  | 0.00045231  | Activation | 0.851549673  | 29126 |
| TGCT | CD274 | CellCycle  | 0.464544729 | None       | 0.180011055  | 29126 |
| TGCT | CD274 | DNADamage  | 0.006559953 | Activation | 0.984852207  | 29126 |
| TGCT | CD274 | EMT        | 0.464544729 | None       | 0.212312985  | 29126 |

|      |       |            |             |            |              |       |
|------|-------|------------|-------------|------------|--------------|-------|
| TGCT | CD274 | Hormone AR | 0.042449824 | Activation | 0.514779966  | 29126 |
| TGCT | CD274 | Hormone ER | 0.000013359 | Activation | 0.82521438   | 29126 |
| TGCT | CD274 | PI3KAKT    | 0.230375298 | None       | -0.289974405 | 29126 |
| TGCT | CD274 | RASMAPK    | 0.015699853 | Inhibition | -0.627669824 | 29126 |
| TGCT | CD274 | RTK        | 0.012545873 | Inhibition | -0.493152553 | 29126 |
| TGCT | CD274 | TSCmTOR    | 0.080566692 | None       | -0.306838587 | 29126 |
| TGCT | YY1   | Apoptosis  | 0.004945547 | Activation | 0.67984029   | 7528  |
| TGCT | YY1   | CellCycle  | 0.000059832 | Activation | 1.0658646    | 7528  |
| TGCT | YY1   | DNADamage  | 0.00827304  | Activation | 0.914632513  | 7528  |
| TGCT | YY1   | EMT        | 0.029065479 | Inhibition | -0.64557762  | 7528  |
| TGCT | YY1   | Hormone AR | 0.101575815 | None       | 0.403091404  | 7528  |
| TGCT | YY1   | Hormone ER | 0.003334638 | Activation | 0.594044367  | 7528  |
| TGCT | YY1   | PI3KAKT    | 0.457872041 | None       | 0.16240055   | 7528  |
| TGCT | YY1   | RASMAPK    | 0.004077929 | Inhibition | -0.756350369 | 7528  |
| TGCT | YY1   | RTK        | 0.026215497 | Inhibition | -0.42480271  | 7528  |
| TGCT | YY1   | TSCmTOR    | 0.183088194 | None       | -0.224546911 | 7528  |
| THCA | CD274 | Apoptosis  | 0.000886609 | Activation | 0.401747108  | 29126 |
| THCA | CD274 | CellCycle  | 0.091161737 | None       | -0.301296044 | 29126 |
| THCA | CD274 | DNADamage  | 0.000034167 | Inhibition | -0.505901643 | 29126 |
| THCA | CD274 | EMT        | 0.000031729 | Activation | 1.104645749  | 29126 |
| THCA | CD274 | Hormone AR | 0.000058146 | Inhibition | -0.923052944 | 29126 |
| THCA | CD274 | Hormone ER | 0.909486854 | None       | 0.011609464  | 29126 |
| THCA | CD274 | PI3KAKT    | 0.000125825 | Inhibition | -0.878446671 | 29126 |
| THCA | CD274 | RASMAPK    | 0.05035394  | None       | -0.337143533 | 29126 |

|      |       |            |             |            |              |       |
|------|-------|------------|-------------|------------|--------------|-------|
| THCA | CD274 | RTK        | 0.000243086 | Inhibition | -0.564606539 | 29126 |
| THCA | CD274 | TSCmTOR    | 0.088113289 | None       | -0.312735204 | 29126 |
| THCA | YY1   | Apoptosis  | 0.064101458 | None       | -0.312290687 | 7528  |
| THCA | YY1   | CellCycle  | 0.609835683 | None       | 0.105198659  | 7528  |
| THCA | YY1   | DNADamage  | 0.371110427 | None       | -0.182099536 | 7528  |
| THCA | YY1   | EMT        | 0.476557113 | None       | -0.252459401 | 7528  |
| THCA | YY1   | Hormone AR | 0.609835683 | None       | 0.140681948  | 7528  |
| THCA | YY1   | Hormone ER | 0.414075331 | None       | -0.14414755  | 7528  |
| THCA | YY1   | PI3KAKT    | 0.476557113 | None       | -0.215486602 | 7528  |
| THCA | YY1   | RASMAPK    | 0.888018454 | None       | 0.022716518  | 7528  |
| THCA | YY1   | RTK        | 0.371110427 | None       | -0.26328452  | 7528  |
| THCA | YY1   | TSCmTOR    | 0.434284528 | None       | -0.21550691  | 7528  |
| THYM | CD274 | Apoptosis  | 0.126220305 | None       | 0.359278003  | 29126 |
| THYM | CD274 | CellCycle  | 0.074885822 | None       | -0.640566226 | 29126 |
| THYM | CD274 | DNADamage  | 0.074885822 | None       | -0.486670053 | 29126 |
| THYM | CD274 | EMT        | 0.55613437  | None       | 0.168314295  | 29126 |
| THYM | CD274 | Hormone AR | 0.013645178 | Inhibition | -0.83000138  | 29126 |
| THYM | CD274 | Hormone ER | 0.366532955 | None       | 0.136410321  | 29126 |
| THYM | CD274 | PI3KAKT    | 0.074885822 | None       | 0.638807854  | 29126 |
| THYM | CD274 | RASMAPK    | 0.00895465  | Activation | 0.92260152   | 29126 |
| THYM | CD274 | RTK        | 0.074885822 | None       | 0.412196497  | 29126 |
| THYM | CD274 | TSCmTOR    | 0.126220305 | None       | 0.30179853   | 29126 |
| THYM | YY1   | Apoptosis  | 0.834946293 | None       | -0.242628797 | 7528  |
| THYM | YY1   | CellCycle  | 0.480254952 | None       | 0.605514798  | 7528  |



|      |       |            |             |            |              |       |
|------|-------|------------|-------------|------------|--------------|-------|
| THYM | YY1   | DNADamage  | 0.960216737 | None       | 0.034682383  | 7528  |
| THYM | YY1   | EMT        | 0.93129656  | None       | -0.180456797 | 7528  |
| THYM | YY1   | Hormone AR | 0.834946293 | None       | 0.272508134  | 7528  |
| THYM | YY1   | Hormone ER | 0.699459771 | None       | -0.204800393 | 7528  |
| THYM | YY1   | PI3KAKT    | 0.93129656  | None       | -0.182010871 | 7528  |
| THYM | YY1   | RASMAPK    | 0.960216737 | None       | -0.065314373 | 7528  |
| THYM | YY1   | RTK        | 0.960216737 | None       | -0.013532786 | 7528  |
| THYM | YY1   | TSCmTOR    | 0.960216737 | None       | 0.009239218  | 7528  |
| UCEC | CD274 | Apoptosis  | 0.001037857 | Activation | 1.09343849   | 29126 |
| UCEC | CD274 | CellCycle  | 0.968334642 | None       | -0.148527656 | 29126 |
| UCEC | CD274 | DNADamage  | 0.171029479 | None       | -0.53250477  | 29126 |
| UCEC | CD274 | EMT        | 0.439747356 | None       | 0.496899804  | 29126 |
| UCEC | CD274 | Hormone AR | 0.995659738 | None       | -0.001105325 | 29126 |
| UCEC | CD274 | Hormone ER | 0.769354337 | None       | -0.260341028 | 29126 |
| UCEC | CD274 | PI3KAKT    | 0.171029479 | None       | -1.109264939 | 29126 |
| UCEC | CD274 | RASMAPK    | 0.551060643 | None       | -0.439240678 | 29126 |
| UCEC | CD274 | RTK        | 0.995659738 | None       | -0.007553196 | 29126 |
| UCEC | CD274 | TSCmTOR    | 0.992874757 | None       | -0.066011927 | 29126 |
| UCEC | YY1   | Apoptosis  | 0.459987382 | None       | -0.277308522 | 7528  |
| UCEC | YY1   | CellCycle  | 0.030219927 | Activation | 0.869271968  | 7528  |
| UCEC | YY1   | DNADamage  | 0.020554791 | Activation | 0.785129611  | 7528  |
| UCEC | YY1   | EMT        | 0.459987382 | None       | 0.390696438  | 7528  |
| UCEC | YY1   | Hormone AR | 0.683272228 | None       | 0.10252241   | 7528  |
| UCEC | YY1   | Hormone ER | 0.030219927 | Inhibition | -0.887428458 | 7528  |

|      |       |            |             |            |              |       |
|------|-------|------------|-------------|------------|--------------|-------|
| UCEC | YY1   | PI3KAKT    | 0.020554791 | Inhibition | -1.53957862  | 7528  |
| UCEC | YY1   | RASMAPK    | 0.418108314 | None       | -0.504362117 | 7528  |
| UCEC | YY1   | RTK        | 0.470169613 | None       | -0.255424261 | 7528  |
| UCEC | YY1   | TSCmTOR    | 0.947852235 | None       | -0.016619956 | 7528  |
| UCS  | CD274 | Apoptosis  | 0.478288092 | None       | 0.331939639  | 29126 |
| UCS  | CD274 | CellCycle  | 0.860763015 | None       | -0.138438598 | 29126 |
| UCS  | CD274 | DNADamage  | 0.175585591 | None       | -1.29638     | 29126 |
| UCS  | CD274 | EMT        | 0.175585591 | None       | -1.158720101 | 29126 |
| UCS  | CD274 | Hormone AR | 0.238546627 | None       | -0.976277116 | 29126 |
| UCS  | CD274 | Hormone ER | 0.382469559 | None       | 0.322889965  | 29126 |
| UCS  | CD274 | PI3KAKT    | 0.890293765 | None       | -0.100839315 | 29126 |
| UCS  | CD274 | RASMAPK    | 0.017965371 | Activation | 1.204097876  | 29126 |
| UCS  | CD274 | RTK        | 0.238546627 | None       | 0.643935634  | 29126 |
| UCS  | CD274 | TSCmTOR    | 0.890293765 | None       | 0.08824649   | 29126 |
| UCS  | YY1   | Apoptosis  | 0.772812023 | None       | -0.249450192 | 7528  |
| UCS  | YY1   | CellCycle  | 0.992049754 | None       | 0.008412456  | 7528  |
| UCS  | YY1   | DNADamage  | 0.992049754 | None       | -0.006940108 | 7528  |
| UCS  | YY1   | EMT        | 0.657421599 | None       | -0.678880447 | 7528  |
| UCS  | YY1   | Hormone AR | 0.808161206 | None       | -0.278256575 | 7528  |
| UCS  | YY1   | Hormone ER | 0.772812023 | None       | -0.167736856 | 7528  |
| UCS  | YY1   | PI3KAKT    | 0.657421599 | None       | 0.86858377   | 7528  |
| UCS  | YY1   | RASMAPK    | 0.772812023 | None       | 0.283041801  | 7528  |
| UCS  | YY1   | RTK        | 0.546534547 | None       | 0.665470952  | 7528  |
| UCS  | YY1   | TSCmTOR    | 0.462559227 | None       | 1.013862329  | 7528  |

|     |       |            |             |      |              |       |
|-----|-------|------------|-------------|------|--------------|-------|
| UVM | CD274 | Apoptosis  | 0.472851639 | None | 0.85536895   | 29126 |
| UVM | CD274 | CellCycle  | 0.962753496 | None | -0.028528668 | 29126 |
| UVM | CD274 | DNADamage  | 0.310251498 | None | 1.407516799  | 29126 |
| UVM | CD274 | EMT        | 0.887986361 | None | -0.168524292 | 29126 |
| UVM | CD274 | Hormone AR | 0.125557028 | None | 1.176704631  | 29126 |
| UVM | CD274 | Hormone ER | 0.653300685 | None | 0.445060951  | 29126 |
| UVM | CD274 | PI3KAKT    | 0.920984206 | None | -0.26779874  | 29126 |
| UVM | CD274 | RASMAPK    | 0.653300685 | None | -0.578863311 | 29126 |
| UVM | CD274 | RTK        | 0.706026488 | None | -0.419817529 | 29126 |
| UVM | CD274 | TSCmTOR    | 0.887986361 | None | 0.475628807  | 29126 |
| UVM | YY1   | Apoptosis  | 0.586596555 | None | 0.514825123  | 7528  |
| UVM | YY1   | CellCycle  | 0.318478595 | None | 0.885022816  | 7528  |
| UVM | YY1   | DNADamage  | 0.586596555 | None | 0.880152557  | 7528  |
| UVM | YY1   | EMT        | 0.741494226 | None | -0.24781119  | 7528  |
| UVM | YY1   | Hormone AR | 0.318478595 | None | 1.071910794  | 7528  |
| UVM | YY1   | Hormone ER | 0.586596555 | None | 0.312036528  | 7528  |
| UVM | YY1   | PI3KAKT    | 0.586596555 | None | -0.810125241 | 7528  |
| UVM | YY1   | RASMAPK    | 0.318478595 | None | -0.823783346 | 7528  |
| UVM | YY1   | RTK        | 0.741494226 | None | -0.142999588 | 7528  |
| UVM | YY1   | TSCmTOR    | 0.741494226 | None | -0.551877903 | 7528  |

ACC: Adrenocortical carcinoma; BLCA: Bladder Urothelial Carcinoma; BRCA: Breast invasive carcinoma; CESC: Cervical squamous cell carcinoma and endocervical adenocarcinoma; CHOL: Cholangio carcinoma; COAD: Colon adenocarcinoma; DLBC: Lymphoid Neoplasm Diffuse Large B-cell Lymphoma; ESCA: Esophageal carcinoma; FDR: false discovery rate; GBM: Glioblastoma multiforme; HNSC: Head and Neck squamous cell carcinoma; KICH: Kidney Chromophobe; KIRC: Kidney renal clear cell carcinoma; KIRP: Kidney renal papillary cell carcinoma; LGG: Brain Lower Grade Glioma; LIHC: Liver hepatocellular carcinoma; LUAD: Lung adenocarcinoma; LUSC: Lung squamous cell carcinoma; MESO: Mesothelioma; OV: Ovarian serous cystadenocarcinoma; PAAD: Pancreatic adenocarcinoma; PCPG: Pheochromocytoma and Paraganglioma; PRAD: Prostate adenocarcinoma; READ: Rectum adenocarcinoma; SARC: Sarcoma; SKCM: Skin Cutaneous Melanoma; STAD: Stomach adenocarcinoma; TGCT: Testicular Germ Cell

---

Tumors; THCA: Thyroid carcinoma; THYM: Thymoma; UCEC: Uterine Corpus Endometrial Carcinoma; UCS: Uterine Carcinosarcoma; UVM: Uveal Melanoma.
